# Supplementary material for: Quantitative Succinyl-Proteome Profiling of Camellia sinensis cv. ‘Anji Baicha’ During Periodic Albinism
Source: PubMed Central journal article supplement (PMC5431936; doi:10.1038/s41598-017-02128-x), 2017-05-12

**Quantitative Succinyl-Proteome Profiling of *Camellia sinensis* cv.  
'Anji Baicha' During Periodic Albinism**

Yan-Xia Xu<sup>1+</sup>, Chen-Jia Shen<sup>2+</sup>, Jian-Qiang Ma<sup>1+</sup>, Wei Chen<sup>1</sup>, Juan Mao<sup>1</sup>, Yan-Yan Zhou<sup>3</sup> & Liang Chen<sup>1\*</sup>

1. Tea Research Institute of the Chinese Academy of Agricultural Sciences/ Key Laboratory of Tea Biology and Resources Utilization, Ministry of Agriculture, 9 South Meiling Road, Hangzhou 310008, China
2. College of Life and Environmental Sciences, Hangzhou Normal University, Hangzhou 310036, China.
3. Jingjie PTM Biolab (Hangzhou) Co., Ltd., Hangzhou 310018, China

+ These authors contributed equally to this work.

\*Corresponding author, E-mail:liangchen@tricaas.com; Tel:+86-571-8665 2835,

Fax:+86-571-8665 0056

Supplementary information files:

Table S1-5 and Figure S1-5.

## Supplementary Information

**Table S1.** Detailed information describing the identified lysine SSs and SPs in ‘Anji Baicha’ for each of the three developmental stages.

**Table S2.** Motif analysis of the identified lysine succinylated peptides. K<sup>su</sup> indicates a succinylated lysine and “.” indicates any amino acid.

| Motif                          | Motif Score | Foreground |       | Background |         | Fold Increase |
|--------------------------------|-------------|------------|-------|------------|---------|---------------|
|                                |             | Matches    | Size  | Matches    | Size    |               |
| .....K <sup>su</sup> P.....    | 16          | 589        | 3,148 | 33,261     | 718,656 | 4.04          |
| .....K <sup>su</sup> .E.....   | 16          | 495        | 2,559 | 46,380     | 685,395 | 2.86          |
| .....E..K <sup>su</sup> K..... | 32          | 132        | 2,064 | 6,052      | 639,015 | 6.75          |
| .....RK <sup>su</sup> .....    | 16          | 334        | 1,932 | 38,499     | 632,963 | 2.84          |
| .....KK <sup>su</sup> .....    | 16          | 312        | 1,598 | 52,938     | 594,464 | 2.19          |
| .....K <sup>su</sup> K.....    | 16          | 256        | 1,286 | 41,205     | 541,526 | 2.62          |
| .....K <sup>su</sup> E.....    | 16          | 249        | 1,030 | 44,929     | 500,321 | 2.69          |
| .....K <sup>su</sup> D.....    | 16          | 242        | 781   | 31,593     | 455,392 | 4.47          |
| .....K <sup>su</sup> R.....    | 16          | 215        | 539   | 33,703     | 423,799 | 5.02          |
| .....K <sup>su</sup> .D.....   | 16          | 106        | 324   | 19,530     | 390,096 | 6.53          |
| .....K <sup>su</sup> .P.....   | 16          | 104        | 218   | 18,658     | 370,566 | 9.47          |

**Table S3.** Detailed information on the proteomic profile of three ‘Anji Baicha’ developmental stages.

**Table S4.** The SSs and SPs involved in photosynthesis and carbon fixation in photosynthetic pathways.

**Table S5.** Information describing the protein-protein interaction network for the PDSLs among three ‘Anji Baicha’ developmental stages.

**Figure S1.** (a) Distribution of succinylated peptides according to length in three biological replicates. (b) Distribution of SPs according to the number of SSSs in three biological replicates.

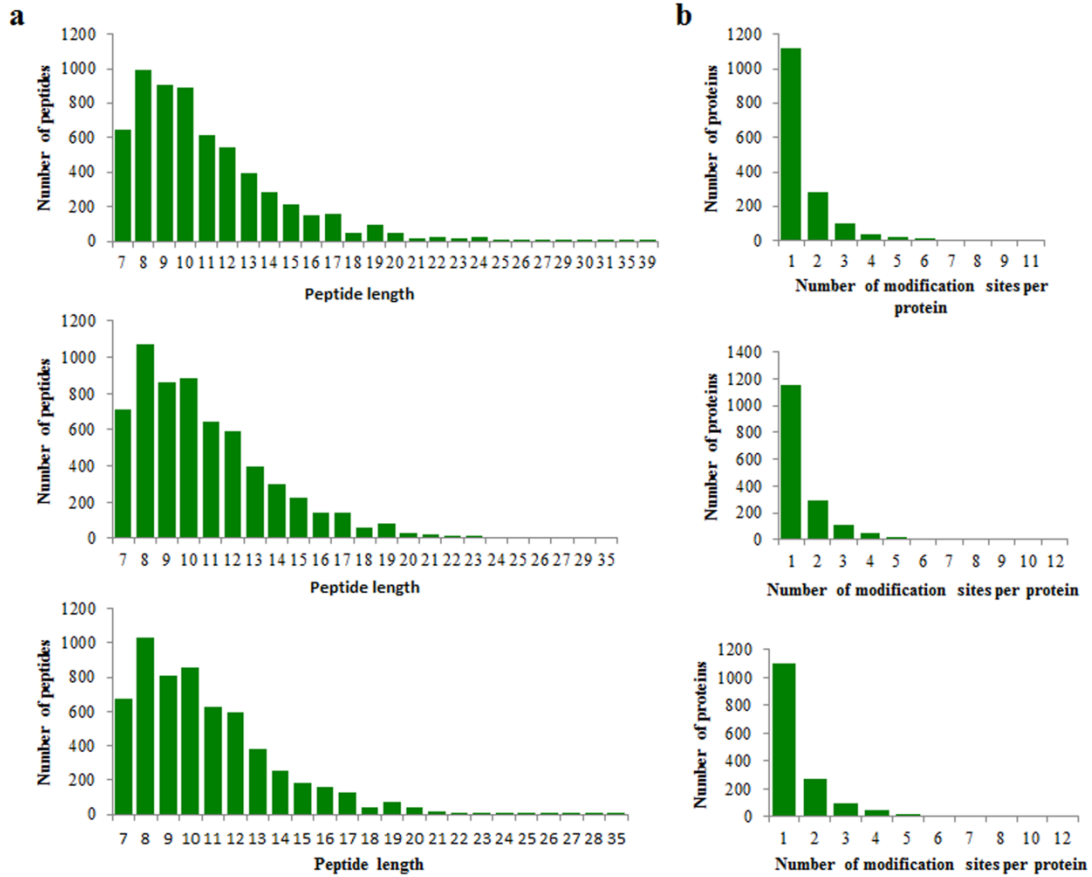

**Figure S2.** The distribution of mass error for the identified peptides in three biological replicates.

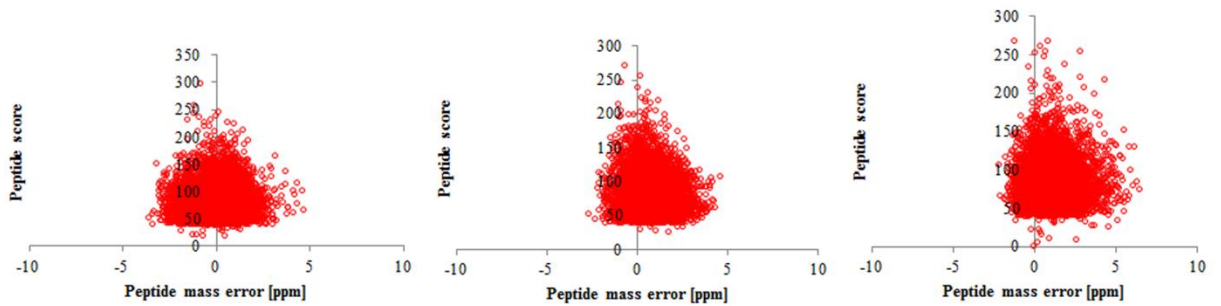

**Figure S3. Comparative analysis of differentially succinylated sites and proteins among the three ‘Anji Baicha’ developmental stages.**

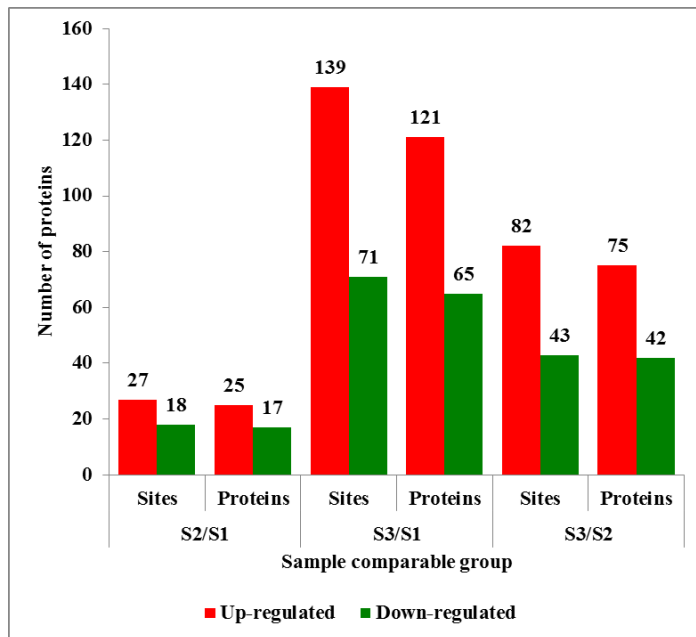

**Figure S4. PDSL protein-protein interaction maps in S2vsS1.**

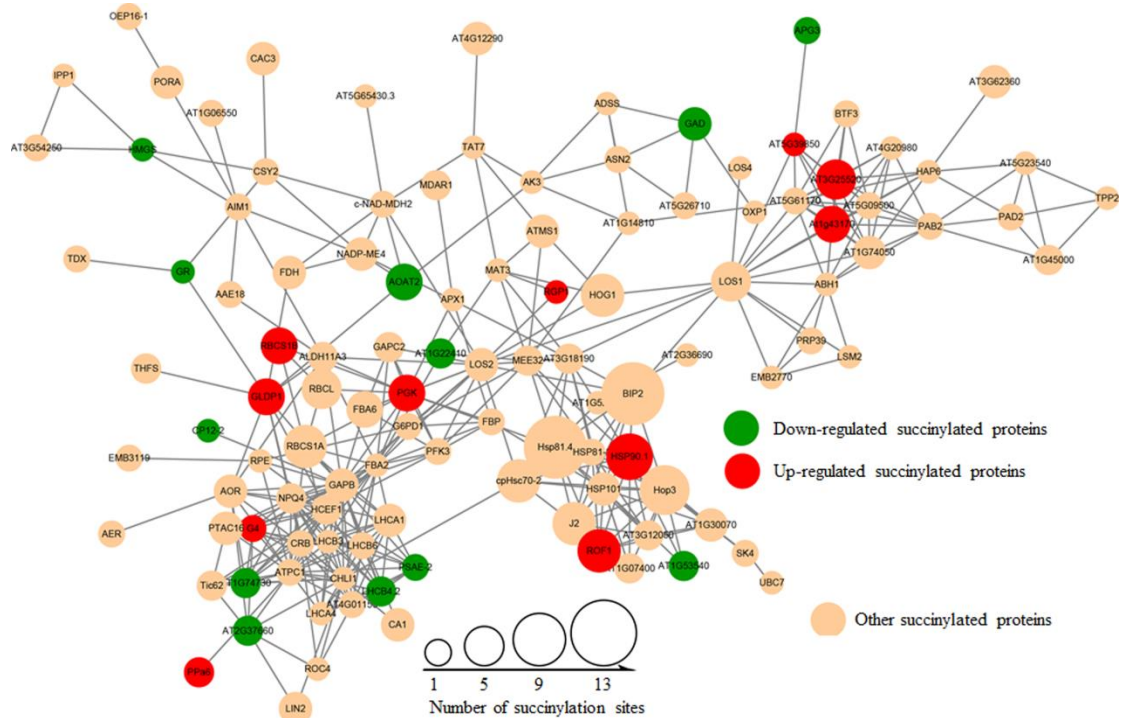

**Figure S5. PDSL protein-protein interaction maps in S3vsS1.**

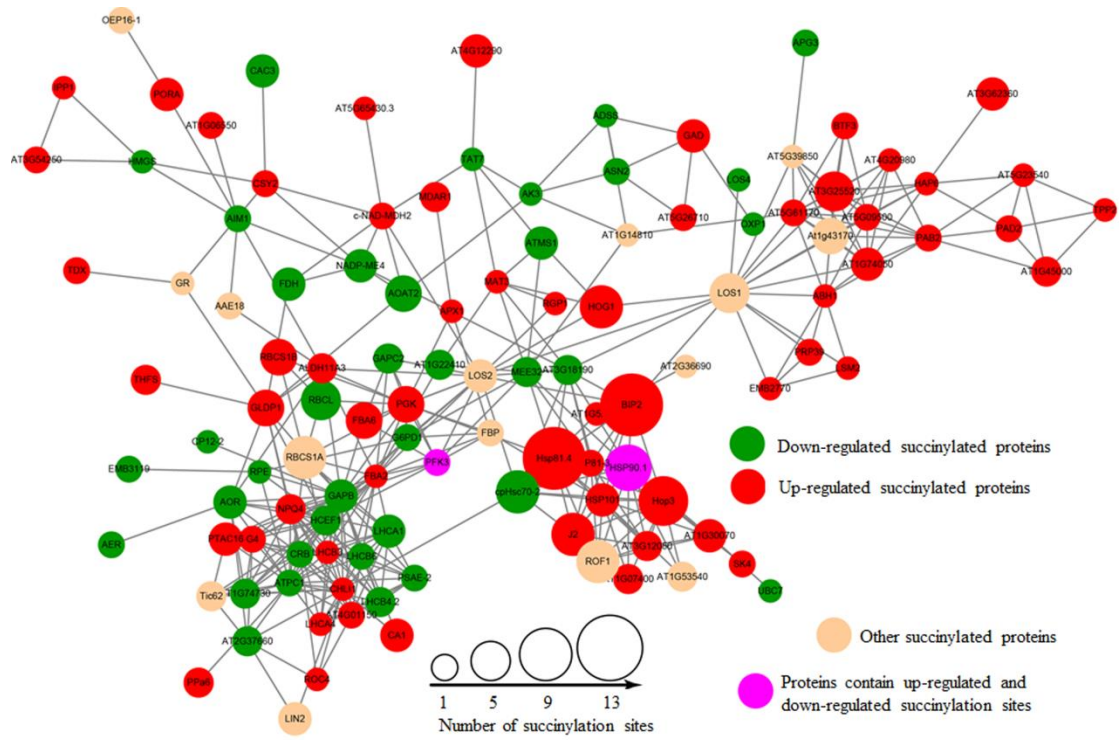

Supplement: 41598_2017_2128_MOESM1_ESM.pdf [file 41598_2017_2128_MOESM1_ESM.pdf]
